# Supplementary material for: Multi-species data integration and gene ranking enrich significant results in an alcoholism genome-wide association study
Source: PubMed Central journal article supplement (PMC3535715; doi:10.1186/1471-2164-13-s8-s16), 2012-12-17
Supplement: 1471-2164-13-S8-S16-S1.pdf [file 1471-2164-13-S8-S16-S1.pdf]

**Additional file 1 - This additional file summarizes the number and proportion of q-values, and p-value of 100 permutation results for different ranked score and q-value range under each of the 10 weighting score matrices.**

### Weighting score matrix 1

Table 1. Number and proportion of q-values for each q-value range and ranked gene score under weighting score matrix 1.

| Score       | $\geq 0.5$      | $\geq 1$        | $\geq 1.5$     | $\geq 2$        | $\geq 2.5$     | $= 3$          |
|-------------|-----------------|-----------------|----------------|-----------------|----------------|----------------|
| All q value | 91774<br>(100%) | 29001<br>(100%) | 8651<br>(100%) | 7516<br>(100%)  | 6539<br>(100%) | 1094<br>(100%) |
| q<0.9       | 6399<br>(7.0%)  | 3000<br>(10.3%) | 382 (4.4%)     | 2012<br>(26.8%) | 710<br>(10.9%) | 161<br>(14.7%) |
| q<0.8       | 469 (0.5%)      | 592 (2.0%)      | 151 (1.7%)     | 148 (2.0%)      | 144 (2.2%)     | 0              |
| q<0.7       | 8 (0.009%)      | 2 (0.007%)      | 5 (0.06%)      | 42 (0.6%)       | 67 (1.0%)      | 0              |
| q<0.6       | 5 (0.005%)      | 2 (0.007%)      | 0              | 0               | 5 (0.08%)      | 0              |
| q<0.5       | 5 (0.005%)      | 0               | 0              | 0               | 0              | 0              |
| q<0.4       | 5 (0.005%)      | 0               | 0              | 0               | 0              | 0              |
| q<0.3       | 0               | 0               | 0              | 0               | 0              | 0              |
| q<0.2       | 0               | 0               | 0              | 0               | 0              | 0              |
| q<0.1       | 0               | 0               | 0              | 0               | 0              | 0              |
| q<0.05      | 0               | 0               | 0              | 0               | 0              | 0              |

Numbers in the parentheses are the proportion of number of q-values.

Table 2. P-value of 100 permutation result for different ranked gene score and q-value range under weighting score matrix 1.

| Score | $\geq 0.5$ | $\geq 1$ | $\geq 1.5$ | $\geq 2$ | $\geq 2.5$ | $= 3$ |
|-------|------------|----------|------------|----------|------------|-------|
| q<0.9 | 0.34       | 0.31     | 0.63       | 0.15     | 0.44       | 0.57  |
| q<0.8 | 0.5        | 0.32     | 0.48       | 0.48     | 0.49       | N/A   |
| q<0.7 | 0.47       | 0.68     | 0.61       | 0.4      | 0.37       | N/A   |
| q<0.6 | 0.25       | 0.5      | N/A        | N/A      | 0.5        | N/A   |
| q<0.5 | 0.11       | N/A      | N/A        | N/A      | N/A        | N/A   |
| q<0.4 | 0.02       | N/A      | N/A        | N/A      | N/A        | N/A   |

N/A: not available due to absence of the real data at those categories.

### Weighting score matrix 2

Table 3. Number and proportion of q-values for each q-value range and ranked gene score under weighting score matrix 2.

| Score       | $\geq 0.5$      | $\geq 1$        | $\geq 1.5$     | $\geq 2$       | $= 2.5$        |
|-------------|-----------------|-----------------|----------------|----------------|----------------|
| All q value | 91774<br>(100%) | 29001<br>(100%) | 8651<br>(100%) | 6539<br>(100%) | 1094<br>(100%) |
| q<0.9       | 6399<br>(7.0%)  | 3000<br>(10.3%) | 382<br>(4.4%)  | 710<br>(10.9%) | 161<br>(14.7%) |
| q<0.8       | 469<br>(0.5%)   | 592<br>(2.0%)   | 151<br>(1.7%)  | 144<br>(2.2%)  | 0              |
| q<0.7       | 8<br>(0.009%)   | 2<br>(0.007%)   | 5 (0.06%)      | 67 (1.0%)      | 0              |
| q<0.6       | 5<br>(0.005%)   | 2<br>(0.007%)   | 0              | 5 (0.08%)      | 0              |
| q<0.5       | 5<br>(0.005%)   | 0               | 0              | 0              | 0              |
| q<0.4       | 5<br>(0.005%)   | 0               | 0              | 0              | 0              |
| q<0.3       | 0               | 0               | 0              | 0              | 0              |
| q<0.2       | 0               | 0               | 0              | 0              | 0              |
| q<0.1       | 0               | 0               | 0              | 0              | 0              |
| q<0.05      | 0               | 0               | 0              | 0              | 0              |

Table 4. P-value of 100 permutation result for different ranked gene score and q-value range under weighting score matrix 2.

| Score | $\geq 0.5$ | $\geq 1$ | $\geq 1.5$ | $\geq 2$ | $= 2.5$ |
|-------|------------|----------|------------|----------|---------|
| q<0.9 | 0.46       | 0.26     | 0.68       | 0.33     | 0.49    |
| q<0.8 | 0.47       | 0.26     | 0.51       | 0.35     | N/A     |
| q<0.7 | 0.51       | 0.59     | 0.68       | 0.31     | N/A     |
| q<0.6 | 0.34       | 0.45     | N/A        | 0.4      | N/A     |
| q<0.5 | 0.17       | N/A      | N/A        | N/A      | N/A     |
| q<0.4 | 0.01       | N/A      | N/A        | N/A      | N/A     |

### Weighting score matrix 3

Table 5. Number and proportion of q-values for each q-value range and ranked gene score under weighting score matrix 3.

| Score       | $\geq 0.5$      | $\geq 1$        | $\geq 1.5$     | $\geq 2$       | $= 2.5$        |
|-------------|-----------------|-----------------|----------------|----------------|----------------|
| All q value | 91774<br>(100%) | 18988<br>(100%) | 7948<br>(100%) | 2293<br>(100%) | 210<br>(100%)  |
| q<0.9       | 6399<br>(7.0%)  | 1863<br>(9.8%)  | 399<br>(5.0%)  | 866<br>(37.8%) | 178<br>(84.8%) |
| q<0.8       | 469<br>(0.5%)   | 415<br>(2.2%)   | 163<br>(2.1%)  | 199<br>(8.7%)  | 108<br>(51.4%) |
| q<0.7       | 8<br>(0.009%)   | 164<br>(0.9%)   | 5 (0.06%)      | 117 (5.1%)     | 72<br>(34.3%)  |
| q<0.6       | 5<br>(0.005%)   | 0               | 0              | 42 (1.8%)      | 53<br>(25.2%)  |
| q<0.5       | 5<br>(0.005%)   | 0               | 0              | 39 (1.7%)      | 0              |
| q<0.4       | 5<br>(0.005%)   | 0               | 0              | 27 (1.2%)      | 0              |
| q<0.3       | 0               | 0               | 0              | 0              | 0              |
| q<0.2       | 0               | 0               | 0              | 0              | 0              |
| q<0.1       | 0               | 0               | 0              | 0              | 0              |
| q<0.05      | 0               | 0               | 0              | 0              | 0              |

Table 6. P-value of 100 permutation result for different ranked gene score and q-value range under weighting score matrix 3.

| Score | $\geq 0.5$ | $\geq 1$ | $\geq 1.5$ | $\geq 2$ | $= 2.5$ |
|-------|------------|----------|------------|----------|---------|
| q<0.9 | 0.39       | 0.42     | 0.68       | 0.18     | 0.05    |
| q<0.8 | 0.49       | 0.35     | 0.53       | 0.28     | 0.16    |
| q<0.7 | 0.5        | 0.23     | 0.67       | 0.21     | 0.09    |
| q<0.6 | 0.24       | N/A      | N/A        | 0.26     | 0.05    |
| q<0.5 | 0.07       | N/A      | N/A        | 0.16     | N/A     |
| q<0.4 | 0.01       | N/A      | N/A        | 0.13     | N/A     |

### Weighting score matrix 4

Table 7. Number and proportion of q-values for each q-value range and ranked gene score under weighting score matrix 4.

| Score       | $\geq 0.5$      | $\geq 1$        | $\geq 1.5$      | $\geq 2$       | $\geq 2.5$     | $=3$          |
|-------------|-----------------|-----------------|-----------------|----------------|----------------|---------------|
| All q value | 91774<br>(100%) | 29001<br>(100%) | 15768<br>(100%) | 7674<br>(100%) | 1191<br>(100%) | 570<br>(100%) |
| q<0.9       | 6399<br>(7.0%)  | 3000<br>(10.3%) | 692 (4.4%)      | 349 (4.5%)     | 2 (0.2%)       | 114 (20%)     |
| q<0.8       | 469 (0.5%)      | 592 (2.0%)      | 305 (1.9%)      | 143 (1.9%)     | 0              | 76 (13.3%)    |
| q<0.7       | 8 (0.009%)      | 2 (0.007%)      | 86 (0.5%)       | 5 (0.07%)      | 0              | 0             |
| q<0.6       | 5 (0.005%)      | 2 (0.007%)      | 0               | 0              | 0              | 0             |
| q<0.5       | 5 (0.005%)      | 0               | 0               | 0              | 0              | 0             |
| q<0.4       | 5 (0.005%)      | 0               | 0               | 0              | 0              | 0             |
| q<0.3       | 0               | 0               | 0               | 0              | 0              | 0             |
| q<0.2       | 0               | 0               | 0               | 0              | 0              | 0             |
| q<0.1       | 0               | 0               | 0               | 0              | 0              | 0             |
| q<0.05      | 0               | 0               | 0               | 0              | 0              | 0             |

Table 8. P-value of 100 permutation result for different ranked gene score and q-value range under weighting score matrix 4.

| Score | $\geq 0.5$ | $\geq 1$ | $\geq 1.5$ | $\geq 2$ | $\geq 2.5$ | $=3$ |
|-------|------------|----------|------------|----------|------------|------|
| q<0.9 | 0.41       | 0.36     | 0.59       | 0.58     | 0.83       | 0.51 |
| q<0.8 | 0.52       | 0.29     | 0.36       | 0.43     | N/A        | 0.34 |
| q<0.7 | 0.57       | 0.63     | 0.29       | 0.58     | N/A        | N/A  |
| q<0.6 | 0.31       | 0.4      | N/A        | N/A      | N/A        | N/A  |
| q<0.5 | 0.12       | N/A      | N/A        | N/A      | N/A        | N/A  |
| q<0.4 | 0.03       | N/A      | N/A        | N/A      | N/A        | N/A  |

### Weighting score matrix 5

Table 9. Number and proportion of q-values for each q-value range and ranked gene score under weighting score matrix 5.

| Score       | $\geq 1$        | $\geq 1.5$      | $\geq 2$        | $\geq 2.5$     | $\geq 3$       | $= 3.5$        |
|-------------|-----------------|-----------------|-----------------|----------------|----------------|----------------|
| All q value | 91774<br>(100%) | 18988<br>(100%) | 11168<br>(100%) | 6686<br>(100%) | 1171<br>(100%) | 266<br>(100%)  |
| q<0.9       | 6399<br>(7.0%)  | 1863<br>(9.8%)  | 2920<br>(26.1%) | 294 (4.4%)     | 310<br>(26.5%) | 132<br>(50.0%) |
| q<0.8       | 469 (0.5%)      | 415 (2.2%)      | 397 (3.6%)      | 126 (1.9%)     | 0              | 5 (1.9%)       |
| q<0.7       | 8 (0.009%)      | 164 (0.9%)      | 109 (1.0%)      | 0              | 0              | 4 (1.5%)       |
| q<0.6       | 5 (0.005%)      | 0               | 0               | 0              | 0              | 2 (0.8%)       |
| q<0.5       | 5 (0.005%)      | 0               | 0               | 0              | 0              | 0              |
| q<0.4       | 5 (0.005%)      | 0               | 0               | 0              | 0              | 0              |
| q<0.3       | 0               | 0               | 0               | 0              | 0              | 0              |
| q<0.2       | 0               | 0               | 0               | 0              | 0              | 0              |
| q<0.1       | 0               | 0               | 0               | 0              | 0              | 0              |
| q<0.05      | 0               | 0               | 0               | 0              | 0              | 0              |

Table 10. P-value of 100 permutation result for different ranked gene score and q-value range under weighting score matrix 5.

| Score | $\geq 1$ | $\geq 1.5$ | $\geq 2$ | $\geq 2.5$ | $\geq 3$ | $= 3.5$ |
|-------|----------|------------|----------|------------|----------|---------|
| q<0.9 | 0.42     | 0.33       | 0.06     | 0.64       | 0.36     | 0.54    |
| q<0.8 | 0.59     | 0.33       | 0.18     | 0.44       | N/A      | 0.76    |
| q<0.7 | 0.58     | 0.27       | 0.2      | N/A        | N/A      | 0.68    |
| q<0.6 | 0.29     | N/A        | N/A      | N/A        | N/A      | 0.54    |
| q<0.5 | 0.12     | N/A        | N/A      | N/A        | N/A      | N/A     |
| q<0.4 | 0        | N/A        | N/A      | N/A        | N/A      | N/A     |

### Weighting score matrix 6

Table 11. Number and proportion of q-values for each q-value range and ranked gene score under weighting score matrix 6.

| Score       | $\geq 0.5$      | $\geq 1$        | $\geq 1.5$      | $\geq 2$        | $\geq 2.5$     | $= 3$          |
|-------------|-----------------|-----------------|-----------------|-----------------|----------------|----------------|
| All q value | 91774<br>(100%) | 81761<br>(100%) | 18285<br>(100%) | 10883<br>(100%) | 1700<br>(100%) | 405<br>(100%)  |
| q<0.9       | 6399<br>(7.0%)  | 5600<br>(6.8%)  | 1902<br>(10.4%) | 728<br>(6.7%)   | 0              | 224<br>(55.3%) |
| q<0.8       | 469<br>(0.5%)   | 463<br>(0.6%)   | 507<br>(2.8%)   | 272<br>(2.5%)   | 0              | 117<br>(28.9%) |
| q<0.7       | 8<br>(0.009%)   | 26<br>(0.03%)   | 179<br>(1.0%)   | 59 (0.5%)       | 0              | 6 (1.5%)       |
| q<0.6       | 5<br>(0.005%)   | 4<br>(0.005%)   | 0               | 0               | 0              | 6 (1.5%)       |
| q<0.5       | 5<br>(0.005%)   | 4<br>(0.005%)   | 0               | 0               | 0              | 0              |
| q<0.4       | 5<br>(0.005%)   | 0               | 0               | 0               | 0              | 0              |
| q<0.3       | 0               | 0               | 0               | 0               | 0              | 0              |
| q<0.2       | 0               | 0               | 0               | 0               | 0              | 0              |
| q<0.1       | 0               | 0               | 0               | 0               | 0              | 0              |
| q<0.05      | 0               | 0               | 0               | 0               | 0              | 0              |

Table 12. P-value of 100 permutation result for different ranked gene score and q-value range under weighting score matrix 6.

| Score | $\geq 0.5$ | $\geq 1$ | $\geq 1.5$ | $\geq 2$ | $\geq 2.5$ | $= 3$ |
|-------|------------|----------|------------|----------|------------|-------|
| q<0.9 | 0.46       | 0.39     | 0.38       | 0.61     | N/A        | 0.29  |
| q<0.8 | 0.5        | 0.59     | 0.23       | 0.39     | N/A        | 0.26  |
| q<0.7 | 0.51       | 0.21     | 0.24       | 0.38     | N/A        | 0.57  |
| q<0.6 | 0.32       | 0.11     | N/A        | N/A      | N/A        | 0.46  |
| q<0.5 | 0.2        | 0.02     | N/A        | N/A      | N/A        | N/A   |
| q<0.4 | 0.03       | N/A      | N/A        | N/A      | N/A        | N/A   |

### Weighting score matrix 7

Table 13. Number and proportion of q-values for each q-value range and ranked gene score under weighting score matrix 7.

| Score       | $\geq 1$        | $\geq 2$        | $\geq 2.5$     | $\geq 3$       | $= 3.5$    |
|-------------|-----------------|-----------------|----------------|----------------|------------|
| All q value | 91774<br>(100%) | 18988<br>(100%) | 6686<br>(100%) | 1762<br>(100%) | 774 (100%) |
| q<0.9       | 6399 (7.0%)     | 1863 (9.8%)     | 294 (4.4%)     | 0              | 2 (0.3%)   |
| q<0.8       | 469 (0.5%)      | 415 (2.2%)      | 126 (1.9%)     | 0              | 2 (0.3%)   |
| q<0.7       | 8 (0.009%)      | 164 (0.09%)     | 0              | 0              | 0          |
| q<0.6       | 5 (0.005%)      | 0               | 0              | 0              | 0          |
| q<0.5       | 5 (0.005%)      | 0               | 0              | 0              | 0          |
| q<0.4       | 5 (0.005%)      | 0               | 0              | 0              | 0          |
| q<0.3       | 0               | 0               | 0              | 0              | 0          |
| q<0.2       | 0               | 0               | 0              | 0              | 0          |
| q<0.1       | 0               | 0               | 0              | 0              | 0          |
| q<0.05      | 0               | 0               | 0              | 0              | 0          |

Table 14. P-value of 100 permutation result for different ranked gene score and q-value range under weighting score matrix 7.

| Score | $\geq 1$ | $\geq 2$ | $\geq 2.5$ | $\geq 3$ | $= 3.5$ |
|-------|----------|----------|------------|----------|---------|
| q<0.9 | 0.4      | 0.53     | 0.59       | N/A      | 0.8     |
| q<0.8 | 0.46     | 0.33     | 0.47       | N/A      | 0.65    |
| q<0.7 | 0.56     | 0.24     | N/A        | N/A      | N/A     |
| q<0.6 | 0.33     | N/A      | N/A        | N/A      | N/A     |
| q<0.5 | 0.14     | N/A      | N/A        | N/A      | N/A     |

### Weighting score matrix 8

Table 15. Number and proportion of q-values for each q-value range and ranked gene score under weighting score matrix 8.

| Score       | $\geq 0.5$   | $\geq 1$     | $\geq 1.5$  | $\geq 2$     | $\geq 2.5$  | $= 3$       |
|-------------|--------------|--------------|-------------|--------------|-------------|-------------|
| All q value | 91774 (100%) | 18988 (100%) | 7948 (100%) | 7516 (100%)  | 2293 (100%) | 210 (100%)  |
| q<0.9       | 6399 (7.0%)  | 1863 (9.8%)  | 399 (5.0%)  | 2012 (26.7%) | 866 (37.8%) | 178 (84.8%) |
| q<0.8       | 469 (0.5%)   | 415 (2.2%)   | 163 (2.1%)  | 148 (2.0%)   | 199 (8.7%)  | 108 (51.4%) |
| q<0.7       | 8 (0.009%)   | 164 (0.09%)  | 5 (0.06%)   | 42 (0.6%)    | 117 (5.1%)  | 72 (34.3%)  |
| q<0.6       | 5 (0.005%)   | 0            | 0           | 0            | 42 (1.8%)   | 53 (25.2%)  |
| q<0.5       | 5 (0.005%)   | 0            | 0           | 0            | 39 (1.7%)   | 0           |
| q<0.4       | 5 (0.005%)   | 0            | 0           | 0            | 27 (1.2%)   | 0           |
| q<0.3       | 0            | 0            | 0           | 0            | 0           | 0           |
| q<0.2       | 0            | 0            | 0           | 0            | 0           | 0           |
| q<0.1       | 0            | 0            | 0           | 0            | 0           | 0           |
| q<0.05      | 0            | 0            | 0           | 0            | 0           | 0           |

Table 16. P-value of 100 permutation result for different ranked gene score and q-value range under weighting score matrix 8.

| Score | $\geq 0.5$ | $\geq 1$ | $\geq 1.5$ | $\geq 2$ | $\geq 2.5$ | $= 3$ |
|-------|------------|----------|------------|----------|------------|-------|
| q<0.9 | 0.36       | 0.4      | 0.55       | 0.13     | 0.2        | 0.09  |
| q<0.8 | 0.48       | 0.34     | 0.36       | 0.38     | 0.24       | 0.13  |
| q<0.7 | 0.53       | 0.29     | 0.63       | 0.35     | 0.16       | 0.13  |
| q<0.6 | 0.33       | N/A      | N/A        | N/A      | 0.21       | 0.08  |
| q<0.5 | 0.15       | N/A      | N/A        | N/A      | 0.1        | N/A   |
| q<0.4 | 0.01       | N/A      | N/A        | N/A      | 0.08       | N/A   |



### Weighting score matrix 9

Table 17. Number and proportion of q-values for each q-value range and ranked gene score under weighting score matrix 9.

| Score       | $\geq 1$        | $\geq 2$        | $\geq 3$       | =4             |
|-------------|-----------------|-----------------|----------------|----------------|
| All q value | 91774<br>(100%) | 18988<br>(100%) | 7948<br>(100%) | 1330<br>(100%) |
| q<0.9       | 6399 (7.0%)     | 1863 (9.8%)     | 399 (5.0%)     | 0              |
| q<0.8       | 469 (0.5%)      | 415 (2.2%)      | 163 (2.1%)     | 0              |
| q<0.7       | 8 (0.009%)      | 164 (0.09%)     | 5 (0.06%)      | 0              |
| q<0.6       | 5 (0.005%)      | 0               | 0              | 0              |
| q<0.5       | 5 (0.005%)      | 0               | 0              | 0              |
| q<0.4       | 5 (0.005%)      | 0               | 0              | 0              |
| q<0.3       | 0               | 0               | 0              | 0              |
| q<0.2       | 0               | 0               | 0              | 0              |
| q<0.1       | 0               | 0               | 0              | 0              |
| q<0.05      | 0               | 0               | 0              | 0              |

Table 18. P-value of 100 permutation result for different ranked gene score and q-value range under weighting score matrix 9.

| Score | $\geq 1$ | $\geq 2$ | $\geq 3$ | =4  |
|-------|----------|----------|----------|-----|
| q<0.9 | 0.4      | 0.36     | 0.55     | N/A |
| q<0.8 | 0.49     | 0.34     | 0.43     | N/A |
| q<0.7 | 0.56     | 0.21     | 0.6      | N/A |
| q<0.6 | 0.26     | N/A      | N/A      | N/A |
| q<0.5 | 0.08     | N/A      | N/A      | N/A |
| q<0.4 | 0.01     | N/A      | N/A      | N/A |

**Weighting score matrix 10**

Table 19. Number and proportion of q-values for each q-value range and ranked gene score under weighting score matrix 10.

| Score       | $\geq 1$        | $\geq 2$        | $\geq 2.5$     | $\geq 3$       | $= 3.5$        |
|-------------|-----------------|-----------------|----------------|----------------|----------------|
| All q value | 91774<br>(100%) | 18988<br>(100%) | 7948<br>(100%) | 1762<br>(100%) | 1330<br>(100%) |
| q<0.9       | 6399<br>(7.0%)  | 1863<br>(9.8%)  | 399 (5.0%)     | 0              | 0              |
| q<0.8       | 469 (0.5%)      | 415 (2.2%)      | 163 (2.1%)     | 0              | 0              |
| q<0.7       | 8 (0.009%)      | 164<br>(0.09%)  | 5 (0.06%)      | 0              | 0              |
| q<0.6       | 5 (0.005%)      | 0               | 0              | 0              | 0              |
| q<0.5       | 5 (0.005%)      | 0               | 0              | 0              | 0              |
| q<0.4       | 5 (0.005%)      | 0               | 0              | 0              | 0              |
| q<0.3       | 0               | 0               | 0              | 0              | 0              |
| q<0.2       | 0               | 0               | 0              | 0              | 0              |
| q<0.1       | 0               | 0               | 0              | 0              | 0              |
| q<0.05      | 0               | 0               | 0              | 0              | 0              |

Table 20. P-value of 100 permutation result for different ranked gene score and q-value range under weighting score matrix 10.

| Score | $\geq 1$ | $\geq 2$ | $\geq 2.5$ | $\geq 3$ | $= 3.5$ |
|-------|----------|----------|------------|----------|---------|
| q<0.9 | 0.48     | 0.35     | 0.65       | N/A      | N/A     |
| q<0.8 | 0.56     | 0.32     | 0.54       | N/A      | N/A     |
| q<0.7 | 0.56     | 0.24     | 0.69       | N/A      | N/A     |
| q<0.6 | 0.41     | N/A      | N/A        | N/A      | N/A     |
| q<0.5 | 0.18     | N/A      | N/A        | N/A      | N/A     |
| q<0.4 | 0.02     | N/A      | N/A        | N/A      | N/A     |
